# Supplementary material for: Efficient differentiation of human embryonic stem cells to retinal pigment epithelium under defined conditions
Source: PubMed Central journal article supplement (PMC8058973; doi:10.1186/s13287-021-02316-7), 2021-04-21
Supplement: 13287_2021_2316_MOESM4_ESM.pdf [file 13287_2021_2316_MOESM4_ESM.pdf]

Table S1 - Media Formulations

**1. Xeno-free/defined RPE Expansion Medium (XFD-REM) (20%)**

| Company           | Product Full Name                               | Catalogue # | [Final] | For 100mL | For 500mL |
|-------------------|-------------------------------------------------|-------------|---------|-----------|-----------|
| Life Technologies | DMEM                                            | 11995073    | 76.9%   | 76.9mL    | 384.5mL   |
| Life Technologies | KnockOut SR XenoFree CTS                        | 12618-013   | 20%     | 20mL      | 100mL     |
| Life Technologies | Sodium Pyruvate Solution 100 mM (100X)          | 11360-070   | 1mM     | 1mL       | 5mL       |
| Life Technologies | Non-Essential Amino Acids Solution 10 mM (100X) | 11140050    | 100µM   | 1mL       | 5mL       |
| Life Technologies | Glutamax 200mM (100x)                           | 35050-061   | 2mM     | 1mL       | 5mL       |
| Sigma             | β-Mercaptoethanol (1000x)                       | 21985023    | 55µM    | 100µL     | 500µL     |

**2. Xeno-free/defined RPE Expansion Medium (XFD-REM) (10%)**

| Company           | Product Full Name                               | Catalogue # | [Final] | For 100mL | For 500mL |
|-------------------|-------------------------------------------------|-------------|---------|-----------|-----------|
| Life Technologies | DMEM                                            | 11995073    | 86.9%   | 86.9mL    | 434.5mL   |
| Life Technologies | KnockOut SR XenoFree CTS                        | 12618-013   | 10%     | 10mL      | 50mL      |
| Life Technologies | Sodium Pyruvate Solution 100 mM (100X)          | 11360-070   | 1mM     | 1mL       | 5mL       |
| Life Technologies | Non-Essential Amino Acids Solution 10 mM (100X) | 11140050    | 100µM   | 1mL       | 5mL       |
| Life Technologies | Glutamax 200mM (100x)                           | 35050-061   | 2mM     | 1mL       | 5mL       |
| Sigma             | β-Mercaptoethanol (1000x)                       | 21985023    | 55µM    | 100µL     | 500µL     |

**3. Xeno-free/defined RPE Maturation Medium (XFD-RMM) (5%)**

| Company           | Product Full Name                               | Catalogue # | [Final] | For 100mL | For 500mL |
|-------------------|-------------------------------------------------|-------------|---------|-----------|-----------|
| Life Technologies | DMEM                                            | 11995073    | 91.9%   | 91.9mL    | 459.5mL   |
| Life Technologies | KnockOut SR XenoFree CTS                        | 12618-013   | 5%      | 5mL       | 25mL      |
| Life Technologies | Sodium Pyruvate Solution 100 mM (100X)          | 11360-070   | 1mM     | 1mL       | 5mL       |
| Life Technologies | Non-Essential Amino Acids Solution 10 mM (100X) | 11140050    | 100µM   | 1mL       | 5mL       |
| Life Technologies | Glutamax 200mM (100x)                           | 35050-061   | 2mM     | 1mL       | 5mL       |
| Sigma             | β-Mercaptoethanol (1000x)                       | 21985023    | 55µM    | 100µL     | 500µL     |

**4. 2% Xeno-free/defined RPE Maturation Medium (XFD-RMM) (2%)**

| Company           | Product Full Name                               | Catalogue # | [Final] | For 100mL | For 500mL |
|-------------------|-------------------------------------------------|-------------|---------|-----------|-----------|
| Life Technologies | DMEM                                            | 11995073    | 94.9%   | 94.9mL    | 474.5mL   |
| Life Technologies | KnockOut SR XenoFree CTS                        | 12618-013   | 2%      | 2mL       | 10mL      |
| Life Technologies | Sodium Pyruvate Solution 100 mM (100X)          | 11360-070   | 1mM     | 1mL       | 5mL       |
| Life Technologies | Non-Essential Amino Acids Solution 10 mM (100X) | 11140050    | 100µM   | 1mL       | 5mL       |
| Life Technologies | Glutamax 200mM (100x)                           | 35050-061   | 2mM     | 1mL       | 5mL       |
| Sigma             | β-Mercaptoethanol (1000x)                       | 21985023    | 55µM    | 100µL     | 500µL     |

Table S2 - Antibodies I

| Antibody   | Host   | Clone      | Isotype | Conjugation      | Supplier | Cat no.      | Application |
|------------|--------|------------|---------|------------------|----------|--------------|-------------|
| α-CRALBP   | Mouse  | B2         | IgG2a   | -                | ABC      | AB15051      | IF/FC       |
| α-Ki67     | Rabbit | Polyclonal | IgG     | -                | ABC      | AB833        | FC          |
| α-MCT-1    | Mouse  | Polyclonal | IgG     | -                | ABC      | AB90582      | IF          |
| α-MITF     | Mouse  | C5         | IgG1    | -                | ABC      | AB12039      | IF          |
| α-MITF     | Mouse  | 21D1418    | IgG1    | DyLight® 650     | NVB      | NB100-56561C | FC          |
| α-MERTK    | Rabbit | Polyclonal | IgG     | -                | INV      | PA5-15028    | IF          |
| α-OCT4     | Rabbit | Polyclonal | IgG     | -                | SGT      | 130-095-635  | IF          |
| α-PAX6     | Rabbit | Polyclonal | IgG     | -                | ABC      | AB5790       | IF          |
| α-PMEL17   | Mouse  | HMB45      | IgG1k   | DyLight® 488     | NVB      | NBP2-34638G  | FC          |
| α-PMEL17   | Rabbit | EP4863(2)  | IgG     | -                | ABC      | AB137078     | IF/FC       |
| α-RAX      | Mouse  | 4F4        | IgG2ak  | -                | SIG      | SAB1405061   | IF/FC       |
| α-RPE65    | Mouse  | Polyclonal | IgG     | -                | ABC      | AB13826      | IF          |
| α-SOX2     | Rabbit | Polyclonal | IgG     | -                | SGT      | 130-095-636  | IF          |
| α-SSEA-4   | Mouse  | MC-813-70  | IgG3k   | Alexa Fluor® 488 | BDB      | 560308       | IF          |
| α-TRA-1-81 | Mouse  | TRA-1-81   | IgMk    | Alexa Fluor® 488 | SCT      | 60065AD      | FC          |
| α-ZO-1     | Mouse  | ZO1-1A12   | IgG1    | Alexa Fluor® 488 | INV      | 339188       | IF          |
| α-ZO-1     | Rabbit | Polyclonal | IgG     | -                | INV      | 61-7300      | IF          |

Application: Immunofluorescence (IF), Flow Cytometry (FC).

| Antibody     | Host   | Clone      | Conjugation      | Supplier | Cat no.     | Application |
|--------------|--------|------------|------------------|----------|-------------|-------------|
| α-Mouse IgM  | Goat   | Polyclonal | FITC             | SCT      | A-10211     | Secondary   |
| α-Mouse IgG  | Goat   | Polyclonal | Alexa Fluor® 488 | INV      | A-11001     | Secondary   |
| α-Mouse IgG  | Goat   | Polyclonal | Alexa Fluor® 568 | INV      | A-11004     | Secondary   |
| α-Rabbit IgG | Goat   | Polyclonal | Alexa Fluor® 488 | INV      | A-11008     | Secondary   |
| α-Rabbit IgG | Goat   | Polyclonal | Alexa Fluor® 568 | INV      | A-11011     | Secondary   |
| α-Rabbit IgG | Goat   | Polyclonal | Alexa Fluor® 647 | INV      | A-21244     | Secondary   |
| α-IgG        | Rabbit | EPR25A     | -                | ABC      | AB172730    | Isotype     |
| α-IgG1       | Mouse  | CT6        | -                | ABC      | AB81216     | Isotype     |
| α-IgG1       | Mouse  | MOPC-21    | DyLight® 650     | NVB      | NBP2-36577C | Isotype     |
| α-IgG1k      | Mouse  | P3.6.2.8.1 | DyLight® 488     | NVB      | NBP1-43319G | Isotype     |
| α-IgG3k      | Mouse  | MG3-35     | PE               | MTB      | 130-095-620 | Isotype     |
| α-IgMk       | Mouse  | MM-30      | DyLight® 488     | SGT      | 09-0072     | Isotype     |
| α-IgMk       | Mouse  | MM-30      | DyLight® 488     | MTB      | 130-095-673 | Isotype     |
| α-IgMk       | Mouse  | MM-30      | Alexa Fluor® 488 | SCT      | 60069AD     | Isotype     |
| α-IgMk       | Mouse  | MM-30      | PE               | SCT      | 60069PE     | Isotype     |

Supplier: Abcam (ABC), BD Biosciences (BDB), Invitrogen (INV), Miltenyi Biotech (MTB), Novus Biologicals (NVB), R&D Systems (R&D), Santa Cruz (SCZ), Sigma (SIG), Stemcell Technologies (SCT), Stemgent (SGT).
