# Supplementary material for: Efficient differentiation of human embryonic stem cells to retinal pigment epithelium under defined conditions
Source: PubMed Central journal article supplement (PMC8058973; doi:10.1186/s13287-021-02316-7), 2021-04-21
Supplement: 13287_2021_2316_MOESM5_ESM.pdf [file 13287_2021_2316_MOESM5_ESM.pdf]

Table S2 - Antibodies I

| Antibody   | Host   | Clone      | Isotype | Conjugation      | Supplier | Cat no.      | Application |
|------------|--------|------------|---------|------------------|----------|--------------|-------------|
| α-CRALBP   | Mouse  | B2         | IgG2a   | -                | ABC      | AB15051      | IF/FC       |
| α-Ki67     | Rabbit | Polyclonal | IgG     | -                | ABC      | AB833        | FC          |
| α-MCT-1    | Mouse  | Polyclonal | IgG     | -                | ABC      | AB90582      | IF          |
| α-MITF     | Mouse  | C5         | IgG1    | -                | ABC      | AB12039      | IF          |
| α-MITF     | Mouse  | 21D1418    | IgG1    | DyLight® 650     | NVB      | NB100-56561C | FC          |
| α-MERTK    | Rabbit | Polyclonal | IgG     | -                | INV      | PA5-15028    | IF          |
| α-OCT4     | Rabbit | Polyclonal | IgG     | -                | SGT      | 130-095-635  | IF          |
| α-PAX6     | Rabbit | Polyclonal | IgG     | -                | ABC      | AB5790       | IF          |
| α-PMEL17   | Mouse  | HMB45      | IgG1k   | DyLight® 488     | NVB      | NBP2-34638G  | FC          |
| α-PMEL17   | Rabbit | EP4863(2)  | IgG     | -                | ABC      | AB137078     | IF/FC       |
| α-RAX      | Mouse  | 4F4        | IgG2ak  | -                | SIG      | SAB1405061   | IF/FC       |
| α-RPE65    | Mouse  | Polyclonal | IgG     | -                | ABC      | AB13826      | IF          |
| α-SOX2     | Rabbit | Polyclonal | IgG     | -                | SGT      | 130-095-636  | IF          |
| α-SSEA-4   | Mouse  | MC-813-70  | IgG3k   | Alexa Fluor® 488 | BDB      | 560308       | IF          |
| α-TRA-1-81 | Mouse  | TRA-1-81   | IgMk    | Alexa Fluor® 488 | SCT      | 60065AD      | FC          |
| α-ZO-1     | Mouse  | ZO1-1A12   | IgG1    | Alexa Fluor® 488 | INV      | 339188       | IF          |
| α-ZO-1     | Rabbit | Polyclonal | IgG     | -                | INV      | 61-7300      | IF          |

Application: Immunofluorescence (IF), Flow Cytometry (FC).

| Antibody     | Host   | Clone      | Conjugation      | Supplier | Cat no.     | Application |
|--------------|--------|------------|------------------|----------|-------------|-------------|
| α-Mouse IgM  | Goat   | Polyclonal | FITC             | SCT      | A-10211     | Secondary   |
| α-Mouse IgG  | Goat   | Polyclonal | Alexa Fluor® 488 | INV      | A-11001     | Secondary   |
| α-Mouse IgG  | Goat   | Polyclonal | Alexa Fluor® 568 | INV      | A-11004     | Secondary   |
| α-Rabbit IgG | Goat   | Polyclonal | Alexa Fluor® 488 | INV      | A-11008     | Secondary   |
| α-Rabbit IgG | Goat   | Polyclonal | Alexa Fluor® 568 | INV      | A-11011     | Secondary   |
| α-Rabbit IgG | Goat   | Polyclonal | Alexa Fluor® 647 | INV      | A-21244     | Secondary   |
| α-IgG        | Rabbit | EPR25A     | -                | ABC      | AB172730    | Isotype     |
| α-IgG1       | Mouse  | CT6        | -                | ABC      | AB81216     | Isotype     |
| α-IgG1       | Mouse  | MOPC-21    | DyLight® 650     | NVB      | NBP2-36577C | Isotype     |
| α-IgG1k      | Mouse  | P3.6.2.8.1 | DyLight® 488     | NVB      | NBP1-43319G | Isotype     |
| α-IgG3k      | Mouse  | MG3-35     | PE               | MTB      | 130-095-620 | Isotype     |
| α-IgMk       | Mouse  | MM-30      | DyLight® 488     | SGT      | 09-0072     | Isotype     |
| α-IgMk       | Mouse  | MM-30      | DyLight® 488     | MTB      | 130-095-673 | Isotype     |
| α-IgMk       | Mouse  | MM-30      | Alexa Fluor® 488 | SCT      | 60069AD     | Isotype     |
| α-IgMk       | Mouse  | MM-30      | PE               | SCT      | 60069PE     | Isotype     |

Supplier: Abcam (ABC), BD Biosciences (BDB), Invitrogen (INV), Miltenyi Biotech (MTB), Novus Biologicals (NVB), R&D Systems (R&D), Santa Cruz (SCZ), Sigma (SIG), Stemcell Technologies (SCT), Stemgent (SGT).
