# Supplementary material for: Efficient differentiation of human embryonic stem cells to retinal pigment epithelium under defined conditions
Source: PubMed Central journal article supplement (PMC8058973; doi:10.1186/s13287-021-02316-7), 2021-04-21
Supplement: 13287_2021_2316_MOESM6_ESM.pdf [file 13287_2021_2316_MOESM6_ESM.pdf]

Table S3 - Primers

## qPCR Primer Sequences

| Transcript        | Forward                    | Reverse                  |
|-------------------|----------------------------|--------------------------|
| <i>OCT4</i>       | AGTTTGTGCCAGGGTTTTTG       | ACTTCACCTTCCCTCCAACC     |
| <i>PAX6 (+5a)</i> | CTCGGTGGTGTCTTTGTCAAC      | ACTTTTGCATCTGCATGGGTC    |
| <i>PAX6 (-5a)</i> | AGTGAATCAGCTCGGTGGTGTCTT   | TGCAGAATTCGGGAAATGTCGCAC |
| <i>LHX2</i>       | TCGGGACTTGGTTTATCACCT      | GCAAGCGGCAGTAGACCAG      |
| <i>RAX</i>        | GTTGAGAGAAGTCCCACTACCCGGAC | CACTTAGCCCGTCGGTTCTGGAAC |
| <i>MITF</i>       | TCACAACCTGATTGAACGAAGAA    | ACTTTCGGATATAGTCCACGGAT  |
| <i>PMEL17</i>     | GTTGATGGCTGTGGTCCTTG       | CAGTGACTGCTGCTATGTGG     |
| <i>RPE65</i>      | CAAGGCTGACACAGGCAAGA       | TTGACGAGGCCCTGAAAAGA     |
| <i>BEST1</i>      | CTTGATGGAGCACCCAGAAGT      | GCTTCATCCCTGTTTTCCAAGG   |
| <i>VEGF</i>       | GGAAACCTTCCTTCCACCCTT      | TGTAGCCTGTCCCCTTCAAGA    |
| <i>PEDF</i>       | TTCAAAGTCCCCGTGAACAAG      | GAGAGCCCGGTGAATGATGG     |
| <i>CLDN19</i>     | CTCAGCGTAGTTGGCATGAA       | GAAGAACTCCTGGGTCACCA     |
| <i>VSX2</i>       | CGGCGACACAGGACAATCTT       | TAGAGCCCATACTCCGCCAT     |
| <i>B-ACTIN</i>    | CAAGATCATTGCTCCTCCTGAG     | TGCTTGCTGATCCACATCTG     |
| <i>GAPDH</i>      | AGAAGGCTGGGGCTCATTTG       | AGGGGCCATCCACAGTCTTC     |
